# Supplementary material
Source: MDPI journal article supplement (https://www.mdpi.com/2077-0472/13/11/2053)
Supplement: s1 [file s1]

SUPPLEMENTARY MATERIAL

**Easily pyrolyzable biomass components significantly affect physicochemical properties and water holding capacity of the pyrolyzed biochar**

**Kaizhao Zhang<sup>1,2,3</sup>, Kun Zhang<sup>4</sup>, Yaoming Li<sup>1,2,3,\*</sup>, Qilin Kang<sup>1,2,3</sup>, Yaofeng Wang<sup>5</sup>, Jing Wang<sup>1,4</sup>, Kai Yang<sup>1,4</sup>, Jiefei Mao<sup>1,2,3</sup>**

<sup>1</sup> State Key Laboratory of Desert and Oasis Ecology, Key Laboratory of Ecological Safety and Sustainable Development in Arid Lands, Xinjiang Institute of Ecology and Geography, Chinese Academy of Sciences, Urumqi, 830011, China

<sup>2</sup> Research Center for Ecology and Environment of Central Asia, Chinese Academy of Sciences, Urumqi, 830011, China

<sup>3</sup> University of Chinese Academy of Sciences, Beijing, 100049, China

<sup>4</sup> College of Ecology and Environment, Xinjiang University, Urumqi, 830017, China

<sup>5</sup> College of Resources and Environment, Xinjiang Agricultural University, Urumqi, 830052, China

Corresponding authors:

Prof. Dr. Yaoming Li

Xinjiang Institute of Ecology and Geography, Chinese Academy of Sciences, Urumqi, China

E-mail: lym@ms.xjb.ac.cn; Tel: +86-991-7827357

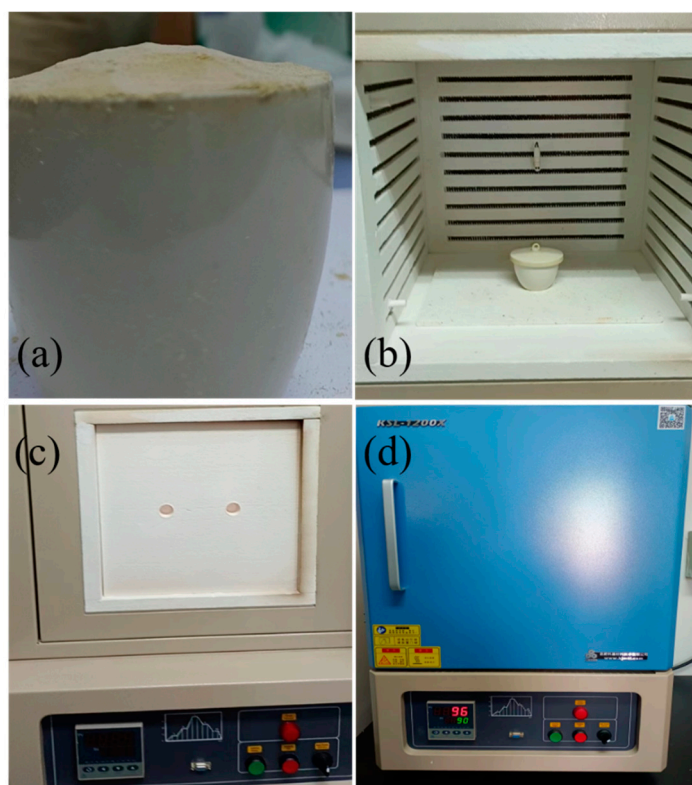

Fig. S1 Biochar preparation process, (a) the compression of the biomass into the crucible, (b) the crucible after compaction of the lid placed inside the muffle furnace, (c) the muffle furnace after placing the heat shield, (d) the muffle furnace in working condition.

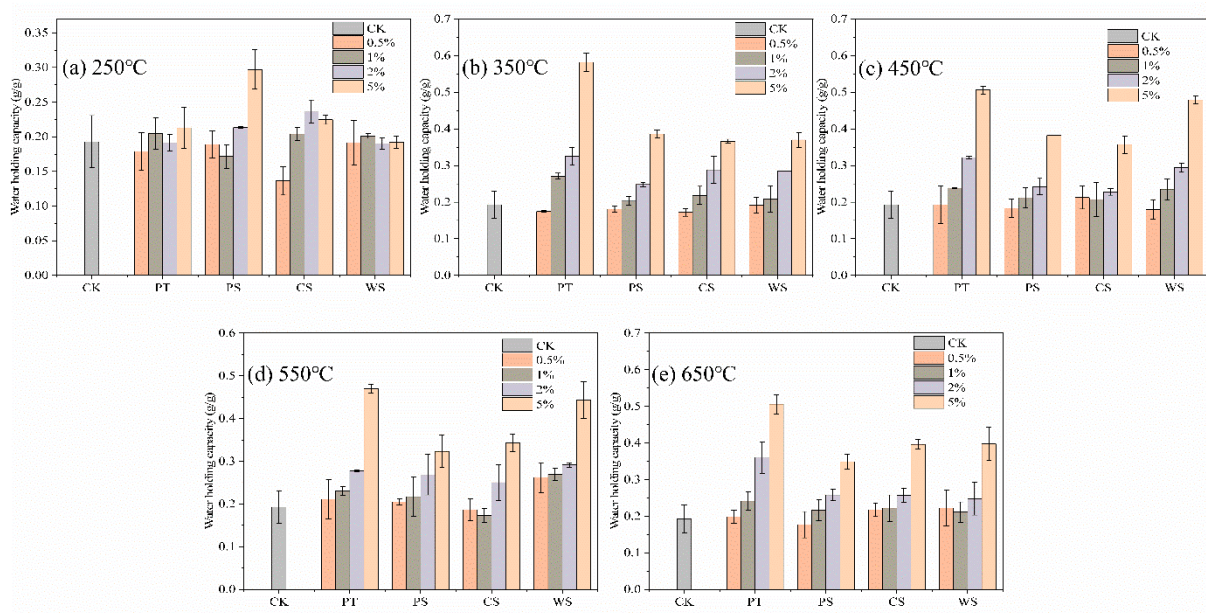

Fig. S2 Difference in water-holding capacity (WHC) of biochar-SS mixtures with different types and additions of biochar pyrolyzed at 250°C (a), 350°C (b), 450°C (c), 550°C (d), 650°C (e).

Table S1 Ratio of peak area of C=O (1700 cm<sup>-1</sup>) to C-H (1456 cm<sup>-1</sup>) of biochar pyrolyzed at different temperatures

| Feedstock | Pyrolysis temperature (°C) |       |       |       |       |
|-----------|----------------------------|-------|-------|-------|-------|
|           | 250°C                      | 350°C | 450°C | 550°C | 650°C |
| PT        | 2.54                       | 0.85  | 0.42  | A     | 0.17  |
| PS        | 1.84                       | 0.35  | A     | A     | A     |
| CS        | 1.93                       | B     | B     | AB    | AB    |
| WS        | 3.86                       | 1.24  | 0.85  | 0.36  | 1.36  |

A and B denote the peak of C=O and C-H are not observed in the FTIR spectra, respectively.

Table S2 Spearman's correlation between the PT biochar properties and the WHC of the biochar-silica sand mixture (5% biochar addition, n=5)

| Biochar properties                  | Correlation<br>coefficient | <i>P</i> value |
|-------------------------------------|----------------------------|----------------|
| Surface area (BET-N <sub>2</sub> )  | 0.000                      | 1.000          |
| Mesopore volume                     | 0.100                      | 0.873          |
| Surface area (BET-CO <sub>2</sub> ) | 0.300                      | 0.624          |
| Micropore volume                    | 0.300                      | 0.624          |
| Aromaticity (H/C)                   | -0.100                     | 0.873          |
| Polarity (O/C)                      | -0.100                     | 0.873          |
| Thermal residual mass of biomass    | -0.100                     | 0.873          |

Table S3 Pearson's correlation (Thermal residual mass of biomass is spearman's correlation) between the PS biochar properties and the WHC of the biochar-silica sand mixture (5% biochar addition, n=5)

| Biochar properties                  | Correlation<br>coefficient | <i>P</i> value |
|-------------------------------------|----------------------------|----------------|
| Surface area (BET-N <sub>2</sub> )  | -0.183                     | 0.768          |
| Mesopore volume                     | -0.103                     | 0.869          |
| Surface area (BET-CO <sub>2</sub> ) | 0.247                      | 0.689          |
| Micropore volume                    | 0.247                      | 0.689          |
| Aromaticity (H/C)                   | -0.355                     | 0.558          |
| Polarity (O/C)                      | -0.448                     | 0.450          |
| Thermal residual mass of biomass    | -0.100                     | 0.873          |

Table S4 Spearman's correlation between the CS biochar properties and the WHC of the biochar-silica sand mixture (5% biochar addition, n=5)

| Biochar properties                  | Correlation<br>coefficient | <i>P</i> value |
|-------------------------------------|----------------------------|----------------|
| Surface area (BET-N <sub>2</sub> )  | 0.700                      | 0.188          |
| Mesopore volume                     | 0.154                      | 0.805          |
| Surface area (BET-CO <sub>2</sub> ) | 0.600                      | 0.285          |
| Micropore volume                    | 0.600                      | 0.285          |
| Aromaticity (H/C)                   | 0.600                      | 0.285          |
| Polarity (O/C)                      | 0.600                      | 0.285          |
| Thermal residual mass of biomass    | 0.600                      | 0.285          |

Table S5 Pearson's correlation (Surface area (BET-CO<sub>2</sub>), Micropore volume, Aromaticity (H/C), Polarity(O/C)) and spearman's correlation (Surface area (BET-N<sub>2</sub>, Mesopore volume, Thermal residual mass of biomass) between the WS biochar properties and the WHC of the biochar-silica sand mixture (5% biochar addition, n=5)

| Biochar properties                  | Correlation<br>coefficient | <i>P</i> value |
|-------------------------------------|----------------------------|----------------|
| Surface area (BET-N <sub>2</sub> )  | 0.600                      | 0.285          |
| Mesopore volume                     | 0.462                      | 0.434          |
| Surface area (BET-CO <sub>2</sub> ) | 0.554                      | 0.332          |
| Micropore volume                    | 0.570                      | 0.315          |
| Aromaticity (H/C)                   | -0.795                     | 0.108          |
| Polarity (O/C)                      | -0.867                     | 0.057          |
| Thermal residual mass of biomass    | 0.600                      | 0.285          |



Table S6 Pearson's correlation between the 250°C-pyrolyzed biochar properties and the WHC of the biochar-silica sand mixture (5% biochar addition, n=4)

| Biochar properties                  | Correlation<br>coefficient | <i>P</i> value |
|-------------------------------------|----------------------------|----------------|
| Surface area (BET-N <sub>2</sub> )  | 0.011                      | 0.989          |
| Mesopore volume                     | 0.924                      | 0.076          |
| Surface area (BET-CO <sub>2</sub> ) | -0.603                     | 0.397          |
| Micropore volume                    | -0.445                     | 0.555          |
| Aromaticity (H/C)                   | 0.454                      | 0.546          |
| Polarity (O/C)                      | 0.186                      | 0.814          |
| Thermal residual mass of biomass    | 0.387                      | 0.613          |

Table S7 Spearman's correlation between the 350°C-pyrolyzed biochar properties and the WHC of the biochar-silica sand mixture (5% biochar addition, n=4)

| Biochar properties                  | Correlation<br>coefficient | <i>P</i> value |
|-------------------------------------|----------------------------|----------------|
| Surface area (BET-N <sub>2</sub> )  | 0.800                      | 0.200          |
| Mesopore volume                     | 1.000                      | 0              |
| Surface area (BET-CO <sub>2</sub> ) | 0.800                      | 0.200          |
| Micropore volume                    | 0.800                      | 0.200          |
| Aromaticity (H/C)                   | 0.800                      | 0.200          |
| Polarity (O/C)                      | 0.400                      | 0.600          |
| Thermal residual mass of biomass    | 0.400                      | 0.600          |

Table S8 Pearson's correlation between the 450°C-pyrolyzed biochar properties and the WHC of the biochar-silica sand mixture (5% biochar addition, n=4)

| Biochar properties                  | Correlation<br>coefficient | <i>P</i> value |
|-------------------------------------|----------------------------|----------------|
| Surface area (BET-N <sub>2</sub> )  | 0.551                      | 0.449          |
| Mesopore volume                     | 0.507                      | 0.493          |
| Surface area (BET-CO <sub>2</sub> ) | 0.353                      | 0.647          |
| Micropore volume                    | 0.318                      | 0.682          |
| Aromaticity (H/C)                   | -0.784                     | 0.216          |
| Polarity (O/C)                      | 0.610                      | 0.390          |
| Thermal residual mass of biomass    | -0.572                     | 0.428          |

Table S9 Pearson's correlation between the 550°C-pyrolyzed biochar properties and the WHC of the biochar-silica sand mixture (5% biochar addition, n=4)

| Biochar properties                  | Correlation<br>coefficient | <i>P</i> value |
|-------------------------------------|----------------------------|----------------|
| Surface area (BET-N <sub>2</sub> )  | .303                       | .697           |
| Mesopore volume                     | .296                       | .704           |
| Surface area (BET-CO <sub>2</sub> ) | -.045                      | .955           |
| Micropore volume                    | .004                       | .996           |
| Aromaticity (H/C)                   | .190                       | .810           |
| Polarity (O/C)                      | -.076                      | .924           |
| Thermal residual mass of biomass    | -.414                      | .586           |

Table S10 Pearson's correlation (Surface area (BET-N<sub>2</sub>), Mesopore volume, Surface area (BET-CO<sub>2</sub>), Micropore volume, Polarity (O/C), Thermal residual mass of biomass) and spearman's correlation (Aromaticity(H/C)) between the 650°C-pyrolyzed biochar properties and the WHC of the biochar-silica sand mixture (5% biochar addition, n=4)

| Biochar properties                  | Correlation<br>coefficient | <i>P</i> value |
|-------------------------------------|----------------------------|----------------|
| Surface area (BET-N <sub>2</sub> )  | 0.401                      | 0.599          |
| Mesopore volume                     | 0.476                      | 0.524          |
| Surface area (BET-CO <sub>2</sub> ) | 0.911                      | 0.089          |
| Micropore volume                    | 0.733                      | 0.267          |
| Aromaticity (H/C)                   | -0.258                     | 0.742          |
| Polarity (O/C)                      | -0.010                     | 0.990          |
| Thermal residual mass of biomass    | -0.628                     | 0.372          |
